# Supplementary material
Source: Springer Nature journal article supplement (https://www.springermedizin.de/resource/supplementary/12933_2013_722_MOESM6_ESM.pdf/9538814)

■ SHAM    ■ MI+PBS    □ MI+MSC

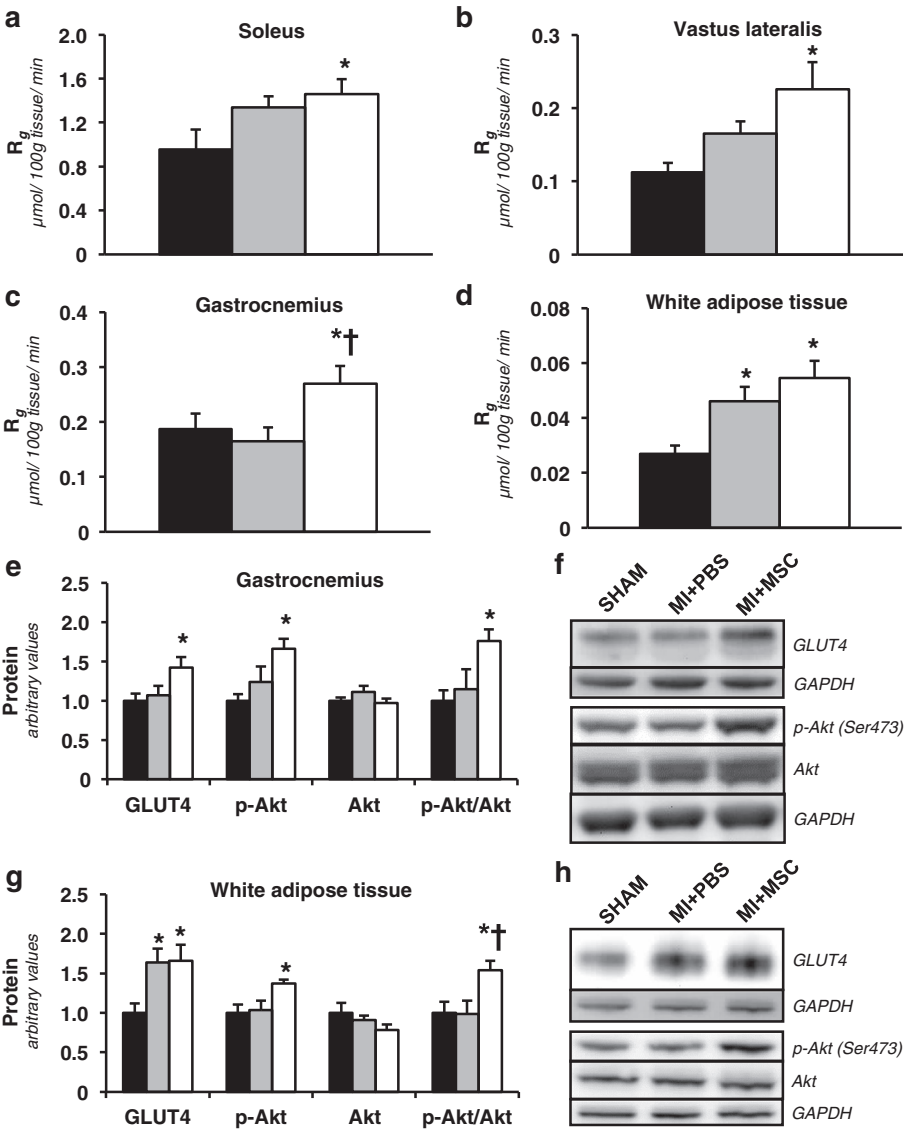

Supplement: MOESM6 [file 9538814]
